# Supplementary material for: Observation of helical water chains reversibly inlayed in magnesium imidazole-4,5-dicarboxylate
Source: Royal Society of Chemistry journal article supplement (doi:10.1039/b806210m), 2008-01-01
Supplement: b806210m.pdf [file b806210m.pdf]

## Supporting Information

### Observation of helical water chains reversibly inlaid in magnesium imidazole-4,5-dicarboxylate

Rui-Qin Zhong,<sup>a,b</sup> Ru-Qiang Zou,<sup>a,b</sup> Miao Du,<sup>a</sup> Nobuhiko Takeichi<sup>a</sup> and Qiang Xu<sup>\*a,b</sup>

<sup>a</sup> National Institute of Advanced Industrial Science and Technology (AIST), Ikeda, Osaka 563-8577, and <sup>b</sup> Graduate School of Science and Technology, Kobe University, Nada Ku, Kobe, Hyogo 657-8501, Japan; E-mail: [q.xu@aist.go.jp](mailto:q.xu@aist.go.jp)

### **Materials and general methods**

All the solvents and reagents for synthesis were commercially available and used as received. FT-IR spectra were recorded on a Bruker IFS 66v/S apparatus. The dry sample powder is mixed with KBr and treated directly in the purpose-made IR cell. Elemental analyses were performed on a Perkin-Elmer 2400 Series II analyzer. PXRD study was executed on a Rigaku X-ray diffractometer at 40 kV, 100 mA for Cu K $\alpha$  radiation ( $\lambda = 1.5406 \text{ \AA}$ ). Emission spectrum was taken on a Perkin Elmer LS50B luminescence spectrophotometer.

**Table S1** Crystal data and structure refinement summary

---

*[Mg(imdc)(H<sub>2</sub>O)<sub>2</sub>](H<sub>2</sub>O)<sub>1.5</sub> (1)*

---

|                                                |                                                                  |
|------------------------------------------------|------------------------------------------------------------------|
| Chemical formula                               | C <sub>5</sub> H <sub>9</sub> N <sub>2</sub> O <sub>7.5</sub> Mg |
| Fw                                             | 241.45                                                           |
| Space group                                    | C2/c                                                             |
| <i>a</i> / Å                                   | 13.936(3)                                                        |
| <i>b</i> / Å                                   | 11.642(2)                                                        |
| <i>c</i> / Å                                   | 12.090(2)                                                        |
| $\beta$ / °                                    | 108.27(3)                                                        |
| <i>V</i> / Å <sup>3</sup>                      | 1862.4(6)                                                        |
| <i>D<sub>c</sub></i> / g cm <sup>-3</sup>      | 1.722                                                            |
| <i>Z</i>                                       | 8                                                                |
| $\mu$ (Mo-K $\alpha$ ) / mm <sup>-1</sup>      | 0.220                                                            |
| <i>F</i> (000)                                 | 1000                                                             |
| Data / restraints / parameters                 | 1676/0/141                                                       |
| Goodness-of-fit on <i>F</i> <sup>2</sup>       | 1.064                                                            |
| <i>R</i> <sup>a</sup> / <i>wR</i> <sup>b</sup> | 0.0291/0.0861                                                    |

---

$$^a R = \sum(|F_o| - |F_c|) / \sum |F_o| \quad ^b wR = [\sum(|F_o|^2 - |F_c|^2)^2 / \sum(F_o^2)]^{1/2}$$

**Table S2** Selected bond parameters (Å, °) for complex **1**

|                    |            |                     |            |
|--------------------|------------|---------------------|------------|
| Mg(1)-O(2)         | 2.0139(12) | Mg(1)-O(3)          | 2.0188(12) |
| Mg(1)-O(2W)        | 2.0713(15) | Mg(1)-O(4)#1        | 2.1137(12) |
| Mg(1)-O(1W)        | 2.1492(14) | Mg(1)-N(2)#1        | 2.1500(13) |
| O(2)-Mg(1)-O(3)    | 95.16(5)   | O(2)-Mg(1)-O(2W)    | 94.88(6)   |
| O(3)-Mg(1)-O(2W)   | 90.37(5)   | O(2)-Mg(1)-O(4)#1   | 93.14(5)   |
| O(3)-Mg(1)-O(4)#1  | 170.23(5)  | O(2W)-Mg(1)-O(4)#1  | 94.06(5)   |
| O(2)-Mg(1)-O(1W)   | 84.11(5)   | O(3)-Mg(1)-O(1W)    | 89.64(5)   |
| O(2W)-Mg(1)-O(1W)  | 178.98(6)  | O(4)#1-Mg(1)-O(1W)  | 86.10(5)   |
| O(2)-Mg(1)-N(2)#1  | 166.95(5)  | O(3)-Mg(1)-N(2)#1   | 95.15(5)   |
| O(2W)-Mg(1)-N(2)#1 | 93.04(6)   | O(4)#1-Mg(1)-N(2)#1 | 75.94(5)   |
| O(1W)-Mg(1)-N(2)#1 | 87.98(5)   |                     |            |

Symmetry codes: #1:  $-x + 0.5, y + 0.5, -z + 0.5$ ; #2:  $-x + 0.5, y - 0.5, -z + 0.5$ .

**Table S3** Hydrogen-bonding geometry (Å, °) for **1**

| <i>D-H...A</i>   | <i>H...A</i> | <i>D...A</i> | <i>D-H...A</i> |
|------------------|--------------|--------------|----------------|
| N1-H1A...O1#1    | 1.917        | 2.788        | 163            |
| O1W-H1WA...O1#2  | 1.976        | 2.788        | 171            |
| O1W-H1WB...O3W   | 2.017        | 2.833        | 174            |
| O2W-H2WA...O3W#3 | 2.052        | 2.861        | 173            |
| O2W-H2WB...O1#4  | 2.173        | 2.966        | 160            |
| O2W-H2WB...O2#4  | 2.351        | 3.046        | 142            |
| O3W-H3WA...O4#5  | 2.181        | 2.900        | 146            |
| O3W-H3WA...O3#5  | 2.646        | 3.289        | 136            |
| O3W-H3WB...O4W#6 | 2.034        | 2.822        | 158            |
| O4W-H4WA...O1W#2 | 2.137        | 2.876        | 150            |

Symmetry codes: #1:  $-x + 1, -y + 1, -z$ ; #2:  $-x + 1, y, -z + 0.5$ ; #3:  $-x + 0.5, y - 0.5, -z + 0.5$ ; #4:  $-x +$

$0.5, -y + 1.5, -z$ ; #5:  $-x + 0.5, -y + 1.5, -z$ ; #6:  $-x + 1, -y + 2, -z + 1$ .
